# Supplementary material for: Characterization of resistance to a potent d-peptide HIV entry inhibitor
Source: PubMed Central journal article supplement (PMC6805555; doi:10.1186/s12977-019-0489-7), 2019-10-22
Supplement: 12977_2019_489_MOESM3_ESM.pdf [file 12977_2019_489_MOESM3_ESM.pdf]

|              | IC50 (nM)     |             | Fold Difference |
|--------------|---------------|-------------|-----------------|
|              | WT            | Q577R       |                 |
| <b>C34</b>   | 0.355 (0.177) | 1.58 (0.30) | 4.8             |
| <b>T20</b>   | 1.62 (0.23)   | 5.33 (0.74) | 3.4             |
| <b>T1249</b> | 0.152 (0.064) | 0.18 (0.05) | 1.2             |
