# Supplementary material for: Characterization of resistance to a potent d-peptide HIV entry inhibitor
Source: Retrovirology. 2019 Oct 22;16:28. doi: 10.1186/s12977-019-0489-7 (PMC6805555; doi:10.1186/s12977-019-0489-7)
Supplement: Supplementary file 1 — Additional file 1. Mutations observed in PIE12-trimer resistant viral pools. Env gene position (pNL4-3 numbering), reference base, and all base calls for control and PIE12-trimer resistance viral populations with a mutation > 10% of the population (with percentage of the base calls for each position colored on a spectrum from low (light pink) to high (red)) are indicated. Additionally, the positions are annotated by their location in Env according to the following categories: known or putative glycosylation site (green), gp120 variable loops (gray), chemokine receptor (co-receptor) binding site (blue), rev-response element (dark gray), gp41 N-trimer (orange), gp41 C-peptide region (light blue), or the Rev coding region included within the env gene (yellow). Eighty-one positions were identified. Of these, 74 conform to our analysis criteria (found in the resistant pool(s) and > 10% different frequency than in the control pool). [file 12977_2019_489_MOESM1_ESM.xlsx]

## Sheet: Sheet2
			Control						9754X8 320nM PIE12-trimer W1						9754X9 320nM PIE12-trimer W2
POS	REF	annotation	A	C	G	T	IN	DEL	A	C	G	T	IN	DEL	A	C	G	T	IN	DEL
82	c								0.0479945	55.5639	0.0411382	44.2852	0.00685636	0.00685636
140	c		11.55	87.7354	0.0289715	0.597867	0.00438962	0.011413
168	g								72.0329	0.0939313	27.7409	0.0295806	0.0108981	0.0166066	56.907	0.0781502	42.8919	0.0244592	0.0053691	0.0125279
273	g		31.6879	0.0129055	68.2272	0.0210564	0.00135848	0.00984897	20.4715	0.0220477	79.4196	0.0305276	0.000339196	0.00407035	10.0871	0.0182549	89.8159	0.0199935	0.000869282	0.0021732
280	t		0.0847079	0.169942	0.0647147	76.6438	22.994	0.00184148	0.0709546	0.0905381	0.070387	84.1351	15.5813	0.00340582
285	g		0.585936	0.130884	76.7944	0.08091	22.2669	0.102063	0.512558	0.102738	84.2234	0.0693411	14.9915	0.0546238
432	a	glyco							0.627939	0.0195594	99.1691	0.0321916	0.00162995	0.0810901	0.829168	0.0147818	98.9223	0.0669802	0.0013858	0.0859194
463	g	V1/V2							17.6782	0.0175402	82.1727	0.0236411	0.00305047	0.0293607	24.3188	0.912743	74.6613	0.0191306	0.00212562	0.0131789
476	g	V1/V2							14.4876	0.0168819	85.3439	0.0344978	0.00183499	0.0341308
508	t	V1/V2							0.0159872	0.0193092	0.00996603	53.0315	0.047131	46.8501	0.0090663	0.0196437	0.00496488	53.0491	0.0591468	46.8298
509	c	V1/V2							9.48786	0.120434	0.0368103	0.0156044	0.000800224	90.2841	9.70428	0.13989	0.0377744	0.0116229	0.00290572	90.0516
510	a	V1/V2							7.66189	0.00286288	0.00613474	0.00204491	0.00122695	92.2845	7.8376	0.00127365	0.00424549	0.00509459	0.000849098	92.1076
511	g	V1/V2							0.0251298	0.00167532	5.29737	0.00335064	0.0213604	94.6164	0.0273914	0.00347828	5.46915	0.00347828	0.022174	94.4317
512	c	V1/V2	99.6112	0.0461328	0.100451	0.0182299	0.00111612	0.148444	2.84043	0.0433882	0.0111692	0.00687338	0.00601421	97.0582	2.89622	0.0384019	0.0138426	0.0107168	0.00535841	96.9904
513	a	V1/V2							0.114186	0.00264525	0.218674	0.0145489	0.000440874	99.6116	0.135243	0.00550141	0.209512	0.0215472	0	99.5787
514	c	V1/V2							0.161028	0.112499	0.00529409	0.0123529	0.000882348	99.6788	0.152753	0.146331	0.00871564	0.0188074	0.000917435	99.6367
515	a	V1/V2							0.132796	0.0264709	0.00308827	0.113384	0.00397063	99.6801	0.166975	0.0238535	0.0041285	0.116057	0.00275233	99.6358
516	a	V1/V2							2.96906	0.00214714	0.00300599	0.00343542	0.000429428	96.9863	3.14718	0.00133733	0.00222888	0.00356621	0.000445776	96.806
517	g	V1/V2							4.89062	0.000840241	0.142001	0.0226865	0.000840241	94.8876	4.92211	0.00262046	0.155481	0.01878	0	94.8512
518	c	V1/V2							0.0219418	2.74911	0.0546551	7.03255	0.0307185	90.0743	0.0264864	3.25576	0.0562837	7.01436	0.0355912	89.5759
519	a	V1/V2							11.8126	0.00227618	0.0515935	0.00341428	2.47801	85.6282	12.3767	0.00156951	0.041592	0.00627803	2.6458	84.908
520	t	V1/V2							0.00950523	0.00456251	0.0155886	14.0963	0.0258542	85.8151	0.0110092	0.00432506	0.0196593	14.8385	0.0173002	85.0797
549	t	V1/V2													0.0299427	66.6271	0.0213876	33.1701	0.00499045	0.0784213
619	t		99.4443	0.0541848	0.131777	0.241447	0.00260087	0.0680561	65.8222	0.0543443	0.0398525	33.9934	0.0016102	0.00925866
620	c								65.5362	34.1718	0.0486743	0.152862	0.00603401	0.00884988
683	t								0.0187053	32.727	0.0427549	67.1211	0.00381741	0.00534437
784	t														0.0431421	46.3879	0.0566769	53.4247	0.00719035	0.010574
884	g														11.5949	0.0258875	88.2506	0.0290254	0.00431459	0.0294176
923	c	glyco	70.6512	27.2226	1.68145	0.241842	0.00286204	0.131654	99.5558	0.133246	0.0535919	0.0477189	0.00330361	0.136916	99.373	0.149945	0.093862	0.206808	0.00194734	0.100872
938	t	V3							64.1794	0.0734368	0.0863962	35.5448	0.00647971	0.0428381	20.2902	0.128258	0.184136	79.25	0.0033752	0.0626287
972	g	V3													39.7932	0.0196849	60.0568	0.0434553	0.00371413	0.0133709
975	a	V3							15.1976	0.0234793	84.5084	0.0353995	0.07405	0.0903049
1043	t														0.635441	19.4988	0.0214281	79.7422	0.00350642	0.0132465
1179	t	V4													17.3777	0.0260203	0.0200485	82.484	0.0102375	0.0162094
1205	g	V4							0.207612	0.0110965	58.0115	0.0332895	2.43085	39.258	0.0586807	0.0106359	57.6245	0.0242058	2.40848	39.8273
1206	t	V4							7.26326	0.0260866	0.102483	24.4196	0.01118	68.0917	6.90877	0.0258151	0.0987428	22.7476	0.00838991	70.1255
1207	t	V4							0.102574	0.0280326	4.62729	25.2899	0.00382263	69.8528	0.0344305	0.0178774	4.30712	23.6041	0.00132425	71.9464
1208	t	V4							0.0404551	0.0224059	0.154974	31.4597	0.00746863	68.234	0.0328996	0.112891	0.10773	29.5703	0.007096	70.0904
1209	a	glyco							33.1122	0.0109633	0.0535984	0.0913609	0.0146177	66.6508	31.7797	0.0100734	0.0144805	0.0207764	0.0157397	68.0893
1210	a	glyco							33.0992	0.296484	0.0243019	0.0261246	0.00303774	66.4797	32.1889	0.288592	0.0224391	0.0143361	0.00623309	67.4065
1211	t	glyco							0.0468206	0.25781	0.023114	34.754	0.005334	64.8478	0.266301	0.125533	0.023766	33.6155	0.00914077	65.894
1212	a	V4							41.7351	0.0052015	0.190722	0.124258	0.0213839	57.8592	40.7002	0.00476332	0.146472	0.045847	0.0357249	59.0158
1213	g	V4							0.233874	0.0501561	43.1483	0.0946767	0.00338131	56.4166	0.143487	0.119669	42.08	0.028465	0.0029046	57.5778
1214	t	V4							0.0967139	0.221841	0.129498	44.7856	0.00928891	54.7013	0.0874634	0.0569923	0.0637636	43.8051	0.00789992	55.9303
1215	a	V4							46.6124	0.0233537	0.162414	0.0201691	0.0031846	53.1328	45.4451	0.0208363	0.110761	0.0180947	0.00822486	54.3493
1216	c	V4							0.0993836	48.0785	0.078271	0.122556	0.00308965	51.5683	0.0244483	46.9509	0.0781283	0.218972	0.0037204	52.6824
1217	t	V4							0.141942	0.119314	0.124457	48.0285	0.00411427	51.5369	0.0713571	0.185848	0.0644344	46.8262	0.00585767	52.8111
1218	t	V4							0.0586209	0.0344526	0.165064	48.1514	0.00411375	51.5308	0.0516227	0.016498	0.179349	46.9255	0.000532192	52.778
1219	g	V4							0.215848	0.049079	49.4822	0.0145234	0.00100161	50.1818	0.14835	0.0492772	48.3041	0.0134864	0.000518707	51.436
1220	g	V4							0.133984	0.0748735	50.3323	0.0566477	0.000492589	49.3525	0.107342	0.0199349	49.096	0.0490705	0	50.6847
1351	g	CKR							12.6005	0.0212412	87.2516	0.0457503	0.00204243	0.00898667
1399	a														83.2701	0.0964377	0.0303349	16.523	0.00181104	0.00860242
1411	g								81.6878	0.0173848	18.1384	0.0238535	0.0177891	0.0287051
1413	t														0.0330462	11.1075	0.0942918	88.6885	0.00176246	0.00308431
1617	c	RRE	0.0810813	4.39878	95.3968	0.0194207	0.000971034	0.027189	0.116821	4.60565	95.1576	0.0139825	0	0.0297692	0.0554448	4.41011	95.3736	0.0194806	0	0.0664339
1618	g	RRE	0.0422099	93.8843	4.21388	0.0739859	1.6884	0.0270333	0.0433134	93.9215	4.14085	0.0804391	1.70027	0.0309381	0.0346793	93.892	4.12879	0.0556823	1.74911	0.0634973
1660	a	N-pep	0.1759	0.0157205	99.7141	0.0220937	0.00339903	0.014021	0.121065	0.0165088	99.7614	0.0259425	0.00353761	0.0149366	0.138211	0.0210224	99.7392	0.0223643	0.00849842	0.0138658
1670	g	N-pep							0.0443178	92.0866	0.122457	7.65415	0.00233252	0.0342102	0.0411133	97.989	0.134392	1.76168	0.00530495	0.0198935
1676	g	N-pep	24.0565	0.0224132	75.8269	0.0190928	0.00332048	0.0103765	14.4006	0.0216778	85.489	0.0240004	0.00270972	0.00541945
1749	c	N-pep							97.2572	2.46888	0.160737	0.0114812	0.00328036	0.0225524
1750	a	N-pep													0.366767	0.0310901	99.4928	0.0213745	0.00437205	0.00631519
1751	g	N-pep							0.121439	97.4072	1.34293	1.0074	0.0233698	0.0267083
1769	g	RRE							99.7559	0.0152061	0.126718	0.0130941	0.000844784	0.0139389	99.7381	0.0121942	0.139501	0.0190229	0.00341437	0.0165841
1854	g	RRE							13.0543	0.0303721	86.8055	0.0263225	0.00323969	0.00647939
1901	c														11.365	87.4993	0.028105	1.00198	0.00681332	0.0114975
1947	c	C-pep	0.0445738	0.775424	0.0192752	99.0583	0.0164642	0.0200783	0.0362549	53.5526	0.0198094	46.2829	0.00710148	0.0291534	0.0444613	2.93361	0.0241005	96.9068	0.00540183	0.0199452
2009	a								0.505171	0.10095	0.0360238	99.1208	0.00921539	0.154567	0.61979	0.102529	0.0401801	99.0782	0.00738945	0.0734326
2041	a	putative glyco													43.319	56.4822	0.0674557	0.0492604	0.00310651	0.00576924
2097	g														21.3169	0.0213206	78.5619	0.0221567	0.00418051	0.00376246
2135	g														20.1403	0.0255962	79.7374	0.0190887	0.00433834	0.0121473
2354	a	rev													34.5166	0.0648339	0.0236893	65.3205	0.00374042	0.0149617
2375	g	rev													0.334677	0.0886377	42.0107	57.4774	0.00238487	0.00158991
2435	g	rev							20.4781	0.0159247	79.2958	0.112181	0.00424659	0.0222946
2450	t														41.6718	0.112558	0.180092	57.9226	0.00127424	0.053518
2452	c														0.0324197	89.4299	0.0518715	10.3851	0.00172905	0.0414972
2488	c								0.19092	1.44718	0.0896973	98.183	0	0.0275606	0.134735	0.477698	0.0825173	99.2025	0	0.0161167
2499	g								15.9573	0.318882	83.5609	0.0738795	0.000631449	0.00252579
2505	g														18.4958	0.0136687	81.3034	0.0210287	0.00105144	0.0704462
2573	g														25.0091	0.0364033	74.6633	0.0728067	0	0.0728067
2579	g								25.1633	0.0343761	74.5273	0	0	0.17188	34.2549	0	65.5108	0	0	0.140581
2599	g								14.2248	0.0374121	85.689	0.0136148	0.00183056	0.0110978
